# Supplementary material for: Limited ER quality control for GPI-anchored proteins
Source: PubMed Central journal article supplement — J Cell Biol. 2016 Jun 20;213(6):693–704. doi: 10.1083/jcb.201602010 (PMC4915193; doi:10.1083/jcb.201602010), 2016-06-20
Supplement: JCB_201602010_sm.pdf [file JCB_201602010_sm.pdf]

Sikorska et al., <http://www.jcb.org/cgi/content/full/jcb.201602010/DC1>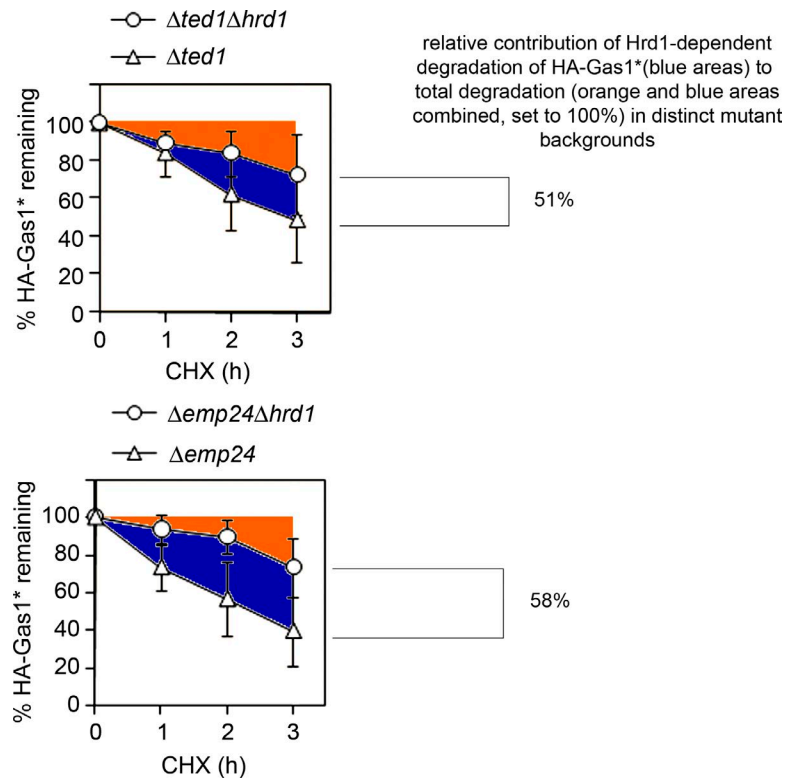

Figure S1. **ERAD is the major degradation pathway for HA-Gas1\* in  $\Delta ted1$  and  $\Delta emp24$  cells.** Graphical display of the degradation rates of HA-Gas1\* in the indicated mutant strains from experiments described in Fig. 3 (E–G). The degradation rates of HA-Gas1\* in the single and double mutants were determined by regression of linear trendlines. The degradation rate of HA-Gas1\* in each individual single mutant was set to 100%. The extent of reduction in HA-Gas1\* degradation in the double mutant compared with the single mutant is indicated in percent. Mean values and SDs from at least three individual experiments are shown.

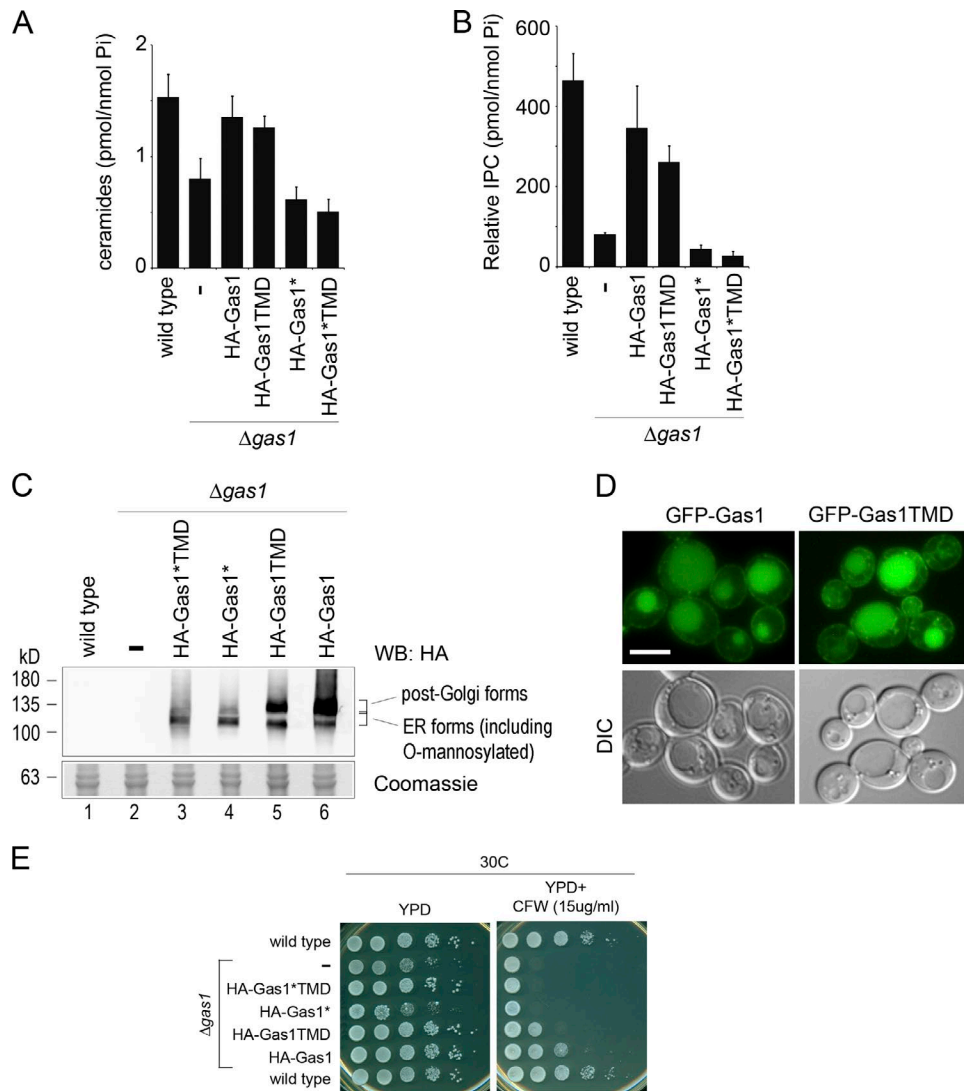

Figure S2. **Lack of evidence for a role of Gas1\* in cellular ceramide cotransport.** (A) Ceramide profile of wild-type cells,  $\Delta gas1$  cells, and  $\Delta gas1$  cells expressing the indicated chromosomally integrated constructs. Three biological replicates were used for quantification, and mean values and SDs are indicated.  $\Delta gas1$  cells showed a drop in total cellular ceramide that could be partially reversed by expressing HA-Gas1 or HA-Gas1TMD but not HA-Gas1\* or HA-Gas1\*TMD. (B) Inositol phosphoceramide C (IPC) profiles of cells used in A. IPC levels were normalized to inorganic phosphate (see Materials and methods). Three biological replicates were used for quantification, and mean values and SDs are indicated. (C) Expression test for different Gas1 and Gas1\* constructs in cells used in A and B. Exponentially growing cells were lysed and analyzed by SDS-PAGE and Western blotting (WB) with antibodies against HA. The lower part of the gel was separately stained with Coomassie as loading control. (D) Live cell fluorescence microscopy of wild-type cells expressing GFP-Gas1 and GFP-Gas1TMD. Both constructs are in part degraded inside the vacuole, likely because of tagging, in agreement with only partial complementation of cell wall defects (E). However, both constructs also show localization at the plasma membrane, demonstrating that Gas1TMD, despite lacking the GPI anchor, can be targeted to the plasma membrane, probably by bulk-flow mechanisms, explaining the observed post-Golgi glycosylation pattern of a fraction of the protein (C, lanes 5 and 6) and partial complementation of cell wall defects (E). DIC = Nomarski image. Bar, 3  $\mu$ m. (E) Drop assay with cells used in A–C in the presence or absence of calcofluor white. Plates were imaged after 2 d (yeast extract peptone dextrose) or 4 d (yeast extract peptone dextrose plus calcofluor white). Gas1 can compensate in part for cell wall defects as well as ceramide and IPC alterations independent of the GPI anchor, suggesting that the observed changes in lipid profiles in  $\Delta gas1$  cells are not caused by a deficiency in (GPI-dependent) ceramide cotransport but rather by lack of Gas1 enzymatic activity. In any case, expression of Gas1\* did not restore lipid profile to those found in wild-type cells.

Table S1. Yeast strains used in this study

| Strain  | Genotype                                                                                                                | Source            |
|---------|-------------------------------------------------------------------------------------------------------------------------|-------------------|
| VG1100  | MATa; BY background                                                                                                     | Laboratory strain |
| VG1302  | MATx; BY background                                                                                                     | Laboratory strain |
| VG1381  | MATa; W303 background                                                                                                   | Laboratory strain |
| VG1382  | MATx; W303 background                                                                                                   | Laboratory strain |
| VG11204 | MATa; W303 background, $\Delta pep4::KanMX6$ , $\Delta hrd1::HygrB$ , containing <i>HA-Gas1</i> * (pMF616, Ylp, URA3)   | This study        |
| VG11206 | MATx; W303 background, $\Delta pep4::KanMX6$ , containing <i>HA-Gas1</i> * (pMF616, Ylp, URA3)                          | This study        |
| VG11242 | MATa; W303 background, $\Delta bst1::KanMX6$                                                                            | This study        |
| VG11403 | MATa; W303 background, containing <i>GFP-Gas1</i> * (NSp19, Ylp, URA3)                                                  | This study        |
| VG11487 | MATa; W303 background, $\Delta hrd1::HygrB$ , containing <i>HA-Gas1</i> *TMD (NSp23, Ylp, URA3)                         | This study        |
| VG11489 | MATa; W303 background, $\Delta hrd1::HygrB$ , $\Delta bst1::KanMX6$ , containing <i>HA-Gas1</i> * (pMF616, Ylp, URA3)   | This study        |
| VG11490 | MATa; W303 background, containing <i>HA-Gas1</i> *TMD (NSp23, Ylp, URA3)                                                | This study        |
| VG11491 | MATa; W303 background, $\Delta emp24::HIS$ , containing <i>Gas1</i> *TMD (NSp23, Ylp, URA3)                             | This study        |
| VG11492 | MATa; W303 background, $\Delta emp24::HIS$ , $\Delta bst1::HygrB$ , containing <i>HA-Gas1</i> * (pMF616, Ylp, URA3)     | This study        |
| VG11737 | MATa; W303 background, $\Delta hrd1::HygrB$ , $\Delta cwh43::HIS$ , containing <i>HA-Gas1</i> * (pMF616, Ylp, URA3)     | This study        |
| VG11746 | MATa; W303 background, $\Delta emp24::HygrB$ , $\Delta cwh43::KanMX6$ , containing <i>HA-Gas1</i> * (pMF616, Ylp, URA3) | This study        |
| VG12612 | MATx; BY background, $\Delta gas1::KanMX6$                                                                              | This study        |
| VG12617 | MATx; BY background, $\Delta gas1::HA-Gas1*TMD (URA3)$                                                                  | This study        |
| VG12620 | MATx; BY background, $\Delta gas1::HA-Gas1TMD (URA3)$                                                                   | This study        |
| VG12622 | MATx; BY background, $\Delta gas1::HA-Gas1$ (URA3)                                                                      | This study        |
| VG12626 | MATx; BY background, $\Delta gas1::HA-Gas1* (URA3)$                                                                     | This study        |
| VG12799 | MATa; W303 background, $\Delta cwh43::HIS$ , containing <i>GFP-Gas1</i> * (NSp19, Ylp, URA3)                            | This study        |
| VG12894 | MATa; W303 background, containing <i>HA-Gas1</i> * $\Delta$ TMD (VGp256, Ylp, URA3)                                     | This study        |
| VG12895 | MATa; W303 background, $\Delta hrd1::HygrB$ , containing <i>HA-Gas1</i> * $\Delta$ TMD (VGp256, Ylp, URA3)              | This study        |
| VG12897 | MATa; W303 background, containing <i>HA-CPY</i> *GPI (clone392, CEN, TRP1)                                              | This study        |
| VG12898 | MATa; W303 background, $\Delta hrd1::HygrB$ , containing <i>HA-CPY</i> *GPI (clone392, CEN, TRP1)                       | This study        |
| VG12900 | MATa; W303 background, containing <i>HA-CPY</i> *TMD (LLp43, CEN, TRP1)                                                 | This study        |
| VG12901 | MATa; W303 background, $\Delta hrd1::HygrB$ , containing <i>HA-CPY</i> *TMD (LLp43, CEN, TRP1)                          | This study        |
| VG12925 | MATx; W303 background, $\Delta pep4::KanMX6$ , containing <i>GFP-CPY</i> *TMD (LLp45, CEN, TRP1)                        | This study        |
| VG12926 | MATx; W303 background, $\Delta pep4::KanMX6$ , containing <i>GFP-CPY</i> *GPI (LLp47, CEN, TRP1)                        | This study        |
| VG12934 | MATa; W303 background, containing <i>GFP-CPY</i> *GPI (clone409, Ylp, URA3)                                             | This study        |
| VG12935 | MATx; W303 background, $\Delta pep4::KanMX6$ , containing <i>GFP-CPY</i> *GPI (clone409, Ylp, URA3)                     | This study        |
| VG12936 | MATa; W303 background, containing <i>GFP-CPY</i> *TMD (clone410, Ylp, URA3)                                             | This study        |
| VG12937 | MATx; W303 background, $\Delta pep4::KanMX6$ , containing <i>GFP-CPY</i> *TMD (clone410, Ylp, URA3)                     | This study        |
| LL1140  | MATa; W303 background, containing <i>GFP-Gas1</i> (LLp16, Ylp, URA3)                                                    | This study        |
| LL1143  | MATa; W303 background, containing <i>GFP-Gas1</i> TMD (LLp17, Ylp, URA3)                                                | This study        |
| LL1147  | MATa; W303 background, containing <i>GFP-Gas1</i> *TMD (LLp18, Ylp, URA3)                                               | This study        |
| LL1303  | MATa; W303 background, containing <i>GFP-CPY</i> *TMD (LLp45, CEN, TRP1)                                                | This study        |
| LL1306  | MATa; W303 background, containing <i>GFP-CPY</i> *GPI (LLp47, CEN, TRP1)                                                | This study        |
| NY1283  | MATa; W303 background, containing <i>HA-Gas1</i> * (pMF616, Ylp, URA3)                                                  | This study        |
| NY1285  | MATx; W303 background, $\Delta ted1::HIS$ , containing <i>HA-Gas1</i> * (pMF616, Ylp, URA3)                             | This study        |
| NY1286  | MATa; W303 background, $\Delta bst1::KanMX6$ , containing <i>HA-Gas1</i> * (pMF616, Ylp, URA3)                          | This study        |
| NY1287  | MATa; W303 background, $\Delta gup1::KanMX6$ , containing <i>HA-Gas1</i> * (pMF616, Ylp, URA3)                          | This study        |
| NY1289  | MATa; W303 background, $\Delta cwh43::KanMX6$ , containing <i>HA-Gas1</i> * (pMF616, Ylp, URA3)                         | This study        |
| NY1290  | MATa; W303 background, $\Delta emp24::HygrB$ , containing <i>HA-Gas1</i> * (pMF616, Ylp, URA3)                          | This study        |
| NY1297  | MATa; W303 background, $\Delta hrd1::HygrB$ , containing <i>HA-Gas1</i> * (pMF616, Ylp, URA3)                           | This study        |
| NY1302  | MATa; W303 background, $\Delta hrd1::HygrB$ , $\Delta ted1::HIS$ , containing <i>HA-Gas1</i> * (pMF616, Ylp, URA3)      | This study        |
| NY1381  | MATa; W303 background, $\Delta hrd1::HygrB$ , $\Delta emp24::HIS$ , containing <i>HA-Gas1</i> * (pMF616, Ylp, URA3)     | This study        |
| NY1428  | MATa; W303 background, $\Delta ted1::HIS$ , containing <i>GFP-Gas1</i> * (NSp19, Ylp, URA3)                             | This study        |
| NY1430  | MATa; W303 background, $\Delta bst1::KanMX6$ , containing <i>GFP-Gas1</i> * (NSp19, Ylp, URA3)                          | This study        |
| NY1443  | MATx; W303 background, <i>EMP24-TAP(HIS3)</i> , containing <i>HA-Gas1</i> * (pMF616, Ylp, URA3)                         | This study        |
| NY1444  | MATx; W303 background, <i>EMP24-TAP(HIS3)</i> , $\Delta ted1::HIS$ , containing <i>HA-Gas1</i> * (pMF616, Ylp, URA3)    | This study        |
| NY1472  | MATa; W303 background, containing <i>HA-Gas1</i> (NSp17, Ylp, URA3)                                                     | This study        |
| NY1474  | MATa; W303 background, containing <i>HA-Gas1</i> TMD (NSp20, Ylp, URA3)                                                 | This study        |
| NY1476  | MATa; W303 background, containing <i>HA-Gas1</i> *TMD (NSp23, Ylp, URA3)                                                | This study        |
| NY1478  | MATx; W303 background, <i>EMP24-TAP(HIS3)</i> , containing <i>HA-Gas1</i> (NSp17, Ylp, URA3)                            | This study        |
| NY1480  | MATx; W303 background, <i>EMP24-TAP(HIS3)</i> , containing <i>HA-Gas1</i> TMD (NSp20, Ylp, URA3)                        | This study        |
| NY1482  | MATx; W303 background, <i>EMP24-TAP(HIS3)</i> , containing <i>HA-Gas1</i> *TMD (NSp23, Ylp, URA3)                       | This study        |
| NY1567  | MATa; W303 background, $\Delta hrd1::HygrB$ , containing <i>GFP-Gas1</i> * (NSp19, Ylp, URA3)                           | This study        |
| NY1568  | MATa; W303 background, $\Delta emp24::HIS$ , containing <i>GFP-Gas1</i> * (NSp19, Ylp, URA3)                            | This study        |

Chromosomal tagging of proteins and gene deletions and integrations were performed using PCR (if needed) in combination with standard homologous recombination techniques.
